# Supplementary material for: Genetic screen in Drosophila muscle identifies autophagy-mediated T-tubule remodeling and a Rab2 role in autophagy
Source: eLife. 2017 Jan 7;6:e23367. doi: 10.7554/eLife.23367 (PMC5249261; doi:10.7554/eLife.23367)
Supplement: Figure 1—source data 1. — Pearson correlation indicating colocalization between GFP or mCD8:GFP with Dlg1 at T-tubules in IOMs at 4d APF (.xlsx file). DOI: http://dx.doi.org/10.7554/eLife.23367.003 [file elife-23367-fig1-data1.xlsx]

## Sheet: Sheet1
Colocalization with Dlg1 Person
GFP control
	Pearson's	Overlap_R	K1	K2	Slope	Intercept
11	0.0256244	0.972506	0.498195	1.89839	0.0025	59.41
12	-0.198124	0.960047	0.933607	0.987236	-0.0794	80.4144
21	-0.0850858	0.96684	0.913902	1.02284	-0.0348	85.4205
22	-0.183402	0.96171	0.90085	1.02668	-0.0705	90.6785
31	-0.108346	0.960358	1.06871	0.86299	-0.0465	100.123
32	-0.179448	0.955883	1.09406	0.835158	-0.0778	97.6096
41	0.0372082	0.965615	0.776733	1.20043	0.0127	69.2979
42	-0.0902192	0.974393	0.636511	1.49163	-0.0219	67.3873
61	0.0361483	0.939117	1.00728	0.875564	0.3272	62.2979
62	0.153412	0.986499	0.960443	1.01326	0.0409	57.5571
mCD8:GFP
11	0.400773	0.967594	0.779888	1.20048	0.3275	53.281
12	0.314303	0.96464	1.1622	0.80066	0.3438	61.825
21	0.285657	0.95509	0.738075	1.23591	0.1967	64.2777
22	0.360414	0.956256	0.867977	1.05351	0.2802	61.4558
31	0.300895	0.963878	0.778923	1.19275	0.2468	52.9937
32	0.38805	0.973488	0.765216	1.23845	0.2102	51.4052
41	0.186192	0.954838	0.852177	1.06987	0.1511	64.6367
51	0.284476	0.963328	0.643477	1.44217	0.1667	55.6231
61	0.382619	0.962833	1.12507	0.823988	0.4391	58.9205
71	0.417222	0.96116	1.13151	0.816459	0.5161	51.818
	GFP	mCD8:GFP		GFP	mCD8:GFP
	0.0256244	0.0256244		-0.0592232	0.294545
	-0.198124	0.314303		0.0371244	0.0366029
	-0.0850858	0.285657
	-0.183402	0.360414
	-0.108346	0.300895
	-0.179448	0.38805
	0.0372082	0.186192
	-0.0902192	0.284476
	0.0361483	0.382619
	0.153412	0.417222
Average	-0.0592232	0.294545
SD	0.117387	0.115738
SEM	0.0371244	0.0366029
P value	2.3484e-06
