# Supplementary material for: Genetic screen in Drosophila muscle identifies autophagy-mediated T-tubule remodeling and a Rab2 role in autophagy
Source: eLife. 2017 Jan 7;6:e23367. doi: 10.7554/eLife.23367 (PMC5249261; doi:10.7554/eLife.23367)
Supplement: Figure 3—source data 1. — Quantification of disorganized IOM mutant phenotypes observed from Rab2 RNAi co-expressed with lacZ negative control or with YFP:Rab2 wildtype rescue at 4d APF (.xlsx file). DOI: http://dx.doi.org/10.7554/eLife.23367.007 [file elife-23367-fig3-data1.xlsx]

## Sheet: Sheet1
16-08-31 Rab2 rescue experiment in pharate IOM							checked at least 10 IOMs per animals
	LacZ			YFP:Rab2wt			IOMs have thin myofibrils and empty space inside were counted as positive
	positive	# of IOMs	%	positive	# of IOMs
1	12	15	80	0	11	0
2	4	12	33.3333	0	13	0
3	12	12	100	0	12	0
4	11	14	78.5714	0	10	0
5	8	13	61.5385	1	11	9.09091
6	11	12	91.6667	3	10	30
7	3	11	27.2727	0	14	0
8	9	12	75	0	12	0
9	10	13	76.9231	2	10	20
10	5	12	41.6667	3	13	23.0769
Average			66.5972			8.21678
SD			24.8205			11.738
LacZ	66.5972	7.85457
YFP:Rab2	8.21678	3.71457
t-test	5.75753e-05
