# Supplementary material for: Genetic screen in Drosophila muscle identifies autophagy-mediated T-tubule remodeling and a Rab2 role in autophagy
Source: eLife. 2017 Jan 7;6:e23367. doi: 10.7554/eLife.23367 (PMC5249261; doi:10.7554/eLife.23367)
Supplement: Figure 4—source data 1. — Pearson correlation indicating colocalization between GFP and mCherry from mCherry:GFP:Atg8 expressed in IOMs at 4d APF of control and RNAi conditions shown (.xlsx file). DOI: http://dx.doi.org/10.7554/eLife.23367.010 [file elife-23367-fig4-data1.xlsx]

## Sheet: Sheet1
tfAtg8 colocalization_ Pearson's r
	LacZ	Rab2 RNAi	Rab7 RNAi	Stx17 RNAi
a	0.426	0.492	0.32	0.33
b	0.1	0.47	0.39	0.35
c	0.248	0.52	0.35	0.29
d	0.09	0.413	0.41	0.23
e	0.2	0.6	0.4	0.35
f	0.16	0.42	0.44	0.42
g	-0.027	0.48	0.43	0.41
h	-0.035	0.38	0.37	0.37
i	0.197	0.41	0.55	0.51
j	0.22	0.46	0.53	0.42
Average	0.1579	0.4645	0.419	0.368
SD	0.136022	0.0643174	0.07325	0.0778603
p-value		2.32549e-05	0.00010829	0.000786327
	LacZ	Rab2 RNAi	Rab7 RNAi	Stx17 RNAi
	0.1579	0.4645	0.419	0.368
	0.136022	0.0643174	0.07325	0.0778603
