# Supplementary material for: Genetic screen in Drosophila muscle identifies autophagy-mediated T-tubule remodeling and a Rab2 role in autophagy
Source: eLife. 2017 Jan 7;6:e23367. doi: 10.7554/eLife.23367 (PMC5249261; doi:10.7554/eLife.23367)
Supplement: Figure 4—source data 2. — Quantification of the number of autophagosomes (Figure 4F) or mitochondria (Figure 5C) manually counted per calculated IOM area at 4d APF for the control and RNAi conditions shown (.xlsx file). DOI: http://dx.doi.org/10.7554/eLife.23367.011 [file elife-23367-fig4-data2.xlsx]

## Sheet: Sheet1
		area(um2)	mitocondoria	mitocondoria/(um2)	average					area(um2)	Autophagosome	AP/1um2	average
LacZ control	1	48.0832	18	0.374351	0.409022			LacZ control	1	48.0832	0	0	0
	2	43.209	23	0.532297					2	43.209	0	0
	3	45.71	11	0.240648					3	45.71	0	0
	6	48.0832	19	0.395148					6	48.0832	0	0
	7	43.192	19	0.439896					7	43.192	0	0
	8	48.0832	12	0.249567					8	48.0832	0	0
	9	43.769	14	0.319861					9	43.769	0	0
	10	41.862	20	0.47776					10	41.862	0	0
	11	48.082	27	0.561541					11	48.082	0	0
	12	48.082	24	0.499147					12	48.082	0	0
Atg1	2	48.0832	63	1.31023	1.16024			Rab2 RNAi	1	44.805	216	4.82089	4.77964
	3	48.0832	48	0.99827					2	48.0832	236	4.90816
	4	48.0832	32	0.665513					3	48.0832	240	4.99135
	5	48.0832	60	1.24784					4	48.0832	208	4.32584
	6	48.0832	24	0.499135					5	48.0832	191	3.97228
	7	48.0832	64	1.33103					6	48.0832	218	4.53381
	8	48.0832	63	1.31023					7	44.677	245	5.48381
	9	43.272	42	0.970605					8	435.516	163	0.374269
	10	48.0832	78	1.62219					9	48.0832	251	5.22012
	11	48.0832	65	1.35182					10	43.484	258	5.93322
	12	48.0832	70	1.45581					11	48.0832	273	5.67766
									12	48.0832	247	5.13693
Atg18	1	48.0832	19	0.395148	1.23354				13	48.0832	196	4.07627
	2	48.0832	38	0.790297					14	48.0832	291	6.05201
	3	48.0832	87	1.80936					15	48.0832	202	4.20105
	4	48.0832	82	1.70538					17	48.0832	304	6.32237
	5	48.0832	59	1.22704					19	48.0832	236	4.90816
	6	48.0832	56	1.16465					20	48.0832	245	5.09533
	7	48.0832	66	1.37262
	8	48.0832	75	1.5598					Rab7 RNAi-4800-5	108.134	263	2.43216	4.55159
	9	48.0832	58	1.20624					6	108.134	239	2.21021
	10	48.0832	35	0.727905				Rab7 RNAi	-10	40.321	135	3.34813
	11	48.0832	56	1.16465					Rab7 RNAi-6800-1	48.0832	305	6.34317
	13	48.0832	33	0.68631					2	48.0832	276	5.74005
	14	48.0832	52	1.08146					Rab7 RNAi-9300-1	23.404	110	4.70005
	15	48.0832	91	1.89255					2	24.874	99	3.98006
	16	48.0832	71	1.47661					3	24.874	140	5.62837
	17	48.0832	71	1.47661					4	24.874	156	6.27161
									5	22.653	101	4.45857
Average まとめ	Average	SD	有意差						7	24.874	97	3.89965
LacZ control	0.409022	0.113225	Lac/Atg1	1.41188e-05					8	22.425	107	4.77146
Atg1	1.16024	0.341073	Lac/Atg18	7.63731e-07					9	24.874	134	5.38715
Atg18	1.23354	0.42586							11	24.874	79	3.17601
LacZ control	0	0	Lac/Rab2	1.4679e-11
Rab2 RNAi	4.77964	1.28996	Lac/Rab7	1.3994e-08				Stx17 RNAi	11	48.0832	337	7.00868	6.13381
Rab7 RNAi	4.55159	1.34303	Lac/Stx17	5.72786e-13					13	48.0832	293	6.0936
Stx17 RNAi	6.13381	0.957981	Rab2/Stx17	0.00163285					14	48.0832	300	6.23919
			Rab7/Stx17	0.000787278					15	48.0832	384	7.98616
									16	48.0832	379	7.88217
									18	48.0832	288	5.98962
									1	48.0832	248	5.15773
									2	48.0832	278	5.78165
									3	48.0832	291	6.05201
									5	48.0832	294	6.1144
									6	48.0832	270	5.61527
									7	48.0832	290	6.03121
									8	48.0832	197	4.09707
									9	48.0832	286	5.94802
									10	48.0832	289	6.01042
