# Supplementary material for: Genetic screen in Drosophila muscle identifies autophagy-mediated T-tubule remodeling and a Rab2 role in autophagy
Source: eLife. 2017 Jan 7;6:e23367. doi: 10.7554/eLife.23367 (PMC5249261; doi:10.7554/eLife.23367)
Supplement: Figure 6—source data 1. — Quantification of the number of GFP:Atg8 puncta manually counted per calculated IOM area over the indicated timecourse from 3IL through 4d APF in wildtype myofibers (.xlsx file). DOI: http://dx.doi.org/10.7554/eLife.23367.014 [file elife-23367-fig6-data1.xlsx]

## Sheet: Sheet1
	3IL		(um2)		1d APF				2d APF				3d APF				4d APF
	Image#	puncta	area	p/a	Image#	puncta	area	p/a	Image#	puncta	area	p/a	Image#	puncta	area	p/a	Image#	puncta	area	p/a
1	F1	2	10081	0.0198393	L1	73	4338	1.6828	L1-4	51	2515	2.02783	F1	15	6085	0.246508	F1	5	7004	0.0713878
2	F2	6	11259	0.0532907	L3	76	3479	2.18454	L2-3	28	2025	1.38272	F2	24	4538	0.528867	F2	4	9394	0.0425804
3	F3-3	4	11151	0.0358712	L4	68	4449	1.52843	L3-5	47	2706	1.73688	F3	14	6080	0.230263	F3	14	5306	0.263852
4	F5	2	10971	0.0182299	L5	151	5315	2.84102	L4-4	47	3442	1.36549	F4	22	4381	0.502168	F4	8	8566	0.0933925
5	F6	2	11781	0.0169765	L6	89	3852	2.31049	L5-6	32	1490	2.14765	F5	19	4990	0.380762	F5	7	8751	0.0799909
6	F7	1	11474	0.00871536	L7	88	5633	1.56222	L6-4	20	1923	1.04004	F6	25	5276	0.473844	F6	7	5578	0.125493
7	L1	3	11459	0.0261803	L8	96	5331	1.80079	L7-5	45	3151	1.42812	F7	9	3872	0.232438	F7	8	5097	0.156955
8	L3	3	10420	0.0287908	L9	112	5065	2.21125	O1-4	26	1283	2.0265	F8	15	4365	0.343643	F8	7	3931	0.178072
9	L4	10	13516	0.0739864	L10	46	3031	1.51765	O2-6	55	2593	2.1211	F9	17	6011	0.282815	F9	8	4949	0.161649
10	L5	12	11355	0.10568	F5	131	4396	2.97998	O3-6	65	2381	2.72995	F10	32	4953	0.646073	F10	25	6434	0.388561
Average				0.0387561				2.06192				1.80063				0.386738				0.156193
SD				0.030465				0.536595				0.502739				0.14492				0.103756
		3IL	1d	2d	3d	4d
	Average	0.0387561	2.06192	1.80063	0.386738	0.156193
	SD	0.030465	0.536595	0.502739	0.14492	0.103756
	p		7.02111e-07	1.08497e-06	1.93287e-05	0.00199554
		# of puncta/ 100 um2
