# Supplementary material for: Genetic screen in Drosophila muscle identifies autophagy-mediated T-tubule remodeling and a Rab2 role in autophagy
Source: eLife. 2017 Jan 7;6:e23367. doi: 10.7554/eLife.23367 (PMC5249261; doi:10.7554/eLife.23367)
Supplement: Figure 6—source data 2. — Quantification of the number of GFP:Atg8 puncta manually counted per calculated IOM area over the indicated timecourse from 3IL through 24h APF in wildtype myofibers (.xlsx file). DOI: http://dx.doi.org/10.7554/eLife.23367.015 [file elife-23367-fig6-data2.xlsx]

## Sheet: Sheet1
	total area	area above threshold	threshold	ratio
12_2a	548168	291163	24-138	0.531157
12_2b	244171	159494	21-115	0.653206
12_2c	604277	361441	18-113	0.598138
12_3a	555480	269769	15-80	0.48565
12_3b	536139	257240	18-62	0.479801
12_3c	316135	177432	20-128	0.561254
12_5a	734413	388244	14-63	0.528645
12_4c	621500	318444	22-72	0.51238
12_4a	463128	243236	24-129	0.525203
12_5b	658641	394313	13-36	0.598677
12_4b	571114	296598	20-91	0.519332
12_5c	631530	270839	18-51	0.428862
18_1a	504160	107317	13-103	0.212863
18_1b	508993	232914	15-70	0.457598
18_1c	397299	122063	14-37	0.307232
18_2a	490766	140684	13-47	0.286662
18_2b	548031	116408	14-53	0.212411
18_2c	495197	162123	16-62	0.327391
18_3a	326271	98293	14-58	0.301262
18_3b	428375	86814	14-41	0.202659
18_4a			24-47	0.2369
18_2c noLac			18-65	0.1436							3IL	12hrs	18hrs	20hrs	24hrs
18_3c noLac			22-63	0.1697						Area TT	49.3436	53.5192	24.8899	3.53306	1.01929
18_2a noLac			20-55	0.1703						Stdev	5.93471	6.0572	8.04677	3.56355	0.734779
18_3a noLac			15-67	0.2887						IOMs	14	12	15	12	14
18_3b noLac			13-46	0.2076						Animals	6	4	6	4	5
18_2b noLac			13-41	0.2086
20_1a	446669	8273	8 to 10	0.0185215
20_1b	280925	27509	10 to 14	0.0979229
20_1c	276500	18064	16-32	0.0653309
20_2a	376992	37505	4 to 6	0.0994849
20_2b	409692	9093	8 to 10	0.0221947
20_2c	338292	0	7-7.37	0
20_3a	396779	4886	13-18	0.0123142
20_3b	396745	9685	8 to 9	0.0244111
20_3c	328737	1325		0.00403058							0	12	18	20	24
20_4a	362260	0		0						Area TT	49.3436	53.5192	24.8899	3.53306	1.01929
20_4b	243266	13199		0.0542575						GFP:Atg8	0.0812321	0.337034	0.680931	1.52068	1.61871
20_4c	325312	8295	10 to 12	0.0254986
3IL_1a	52.41	36-235								Area TT SD	5.93471	6.0572	8.04677	3.56355	0.734779
3IL_1b	43.84	15-255								GFP:Atg8 SD	0.068853	0.157303	0.396751	0.42368	0.818042
3IL_1c	49.68	30-198
3IL_2b	50.71	13-58
3IL_3a	46.94	19-157
3IL_3b	48.63	15-174									0	12	18	20	24
3IL_3c	46.72	15-70								GFP:Atg8	0.0812321	0.337034	0.680931	1.52068	1.61871
3IL_5a	55.29	18-60
3IL_5b	58.58	22-213
3IL_6a	43.19	22-86
3IL_6b	35.24	14-151
3IL_7a	52.33	22-156
3IL_7b	53.62	14-62
3IL_7c	53.63	20-93
24_1a	0.61	25-27
24_1b	1.17	28-36
24_1c	1.08	19-24
24_2a	0.67	20-22
24_2b	0.77	25-29
24_2c	0.48	29-48
24_3a	0.46	14-16
24_3b	0.57	15-19
24_3c	0.32	15-19
24_4a	0.44	20-25
24_4b	1.98	11 to 13
24_4c	1.03	16-20
24_5a	2.88	14-19
24_5b	1.81	15-19
