# Supplementary material for: Genetic screen in Drosophila muscle identifies autophagy-mediated T-tubule remodeling and a Rab2 role in autophagy
Source: eLife. 2017 Jan 7;6:e23367. doi: 10.7554/eLife.23367 (PMC5249261; doi:10.7554/eLife.23367)
Supplement: Figure 6—source data 3. — Quantification of the percent IOM area covered by minimal threshold for GFP:TubbyC-positive T-tubules over the indicated timecourse from 3IL through 24h APF in wildtype myofibers (.xlsx file). DOI: http://dx.doi.org/10.7554/eLife.23367.016 [file elife-23367-fig6-data3.xlsx]

## Sheet: Sheet1
	Animal/IOM	Area (pix^2)	Area (um^2)	# GFP puncta	puncta/100um^2
18hr	1a	265723	6483.64	31	0.478126
	1b	185291	4521.1	20	0.44237
	2a	250902	6122.01	75	1.22509
	2b	158325	3863.13	40	1.03543
	2c	236089	5760.57	54	0.937407
	3b	263668	6433.5	32	0.497397
	3c	258965	6318.75	22	0.34817
	3d	234130	5712.77	31	0.542644
	4b	101987	2488.48	18	0.723332
	4c	274844	6706.19	28	0.417524
	5a	229494	5599.65	27	0.482173
	5b	405346	9890.44	32	0.323545
	5c	311895	7610.24	55	0.722711
	5d	198457	4842.35	33	0.681487
19hr	1a	487543	4531.71	35	0.772335
	1b	844696	7851.45	57	0.725981
	1c	296222	2753.38	19	0.69006
	2a	428357	3981.58	21	0.527429
	2b	348295	3237.4	15	0.463334
	2c	615272	5718.95	25	0.437143
	3a	691355	6426.14	54	0.840317
	3b	796398	7402.52	62	0.837553
	3c	464484	4317.38	30	0.694866
	3d	240784	2238.09	19	0.848939
	4a	543133	5048.42	73	1.446
	4b	625628	5815.21	71	1.22094
	4c	660806	6142.19	33	0.537267
	5a	306982	7490.36	58	0.774329
	6a	243479	5940.89	60	1.00995
	7a	267730	6532.61	43	0.658236
	7b	162866	3973.93	24	0.603936
20hr	1a	285447	6964.91	115	1.65113
	1b	211098	5150.79	97	1.88321
	1c	176405	4304.28	72	1.67275
	2a	258644	6310.91	113	1.79055
	2b	181975	4440.19	33	0.743211
	2c	159112	3882.33	46	1.18485
	3a	185800	4533.52	63	1.38965
	3b	261133	6371.65	129	2.02459
	3c	284917	6951.97	125	1.79805
	3d	267844	6535.39	106	1.62194
	4a	786866	7313.92	116	1.58602
	4b	733346	6816.45	86	1.26165
	4c	599939	5576.43	29	0.520046
	5a	355057	3300.25	29	0.87872
	5b	622145	5782.84	34	0.587947
	5c	816692	7591.15	52	0.685008
24hr	1a	328892	8024.96	167	2.08101	Note: 1 and 2 are with no dcr2																		18 and 20	p = 0.0000057
	1b	240618	5871.08	95	1.6181																			18 and 24	p = 0.00055
	1c	288987	7051.28	127	1.80109
	1d	384150	9373.26	179	1.90969
	2a	209954	5122.88	47	0.917453
	2b	306372	7475.48	28	0.374558
	2c	494966	12077.2	209	1.73054
	3a	239171	5835.77	107	1.83352
	3b	311894	7610.21	156	2.04988
	3c	228455	5574.3	169	3.03177
	4a	344455	8404.7	75	0.892358
	4b	299161	7299.53	87	1.19186
	4c	207538	5063.93	70	1.38233
	5a	187037	4563.7	36	0.788833
	5b	218203	5324.15	27	0.507123
	5c	238307	5814.69	76	1.30703
Shuffle					Animal/IOM	Area (pix^2)	Area (um^2)	# GFP puncta	puncta/100um^2
1	45				5b	405346	9890.44	22	0.222437			0	18	19	20	24		3IL	12hr APF	18hr APF	20hr APF	24hr APF
2	99				5a	229494	5599.65	16	0.285732			0.0812321	0.680931	0.748786	1.52068	1.61871		0.0812321	0.337034	0.680931	1.52068	1.61871
3	40				4c	274844	6706.19	22	0.328055			0.068853	0.396751	0.253107	0.42368	0.818042		0.068853	0.157303	0.396751	0.42368	0.818042
4	115				3c	258965	6318.75	21	0.332344
5	43				1b	185291	4521.1	21	0.464489
6	37			18hr	1a	265723	6483.64	31	0.478126
7	54				5c	311895	7610.24	46	0.604449
8	37				3d	234130	5712.77	38	0.665176
9	21				4b	101987	2488.48	19	0.763517
10	76				3b	263668	6433.5	54	0.839357
11	112				5d	198457	4842.35	43	0.887998
12	106				2b	158325	3863.13	37	0.957773
13	65				2c	236089	5760.57	56	0.972126
14	139				2a	250902	6122.01	106	1.73146
15	204											Animal/IOM	Area (pix^2)	Area (um^2)	# GFP puncta	puncta/100um^2
16	21				2c	615272	5718.95	24	0.419657		3IL	1a	410345	10012.4	11	0.109864
17	58				2a	428357	3981.58	18	0.452082			1b	440568	10749.9	14	0.130234
18	22				2b	348295	3237.4	15	0.463334			1c	406660	9922.5	26	0.262031
19	38				7b	162866	3973.93	23	0.578772			2a	718647	17535	12	0.0684346
20	118				4c	660806	6142.19	37	0.602391			2b	408691	9972.06	18	0.180504
21	75				7a	267730	6532.61	41	0.62762			2c	398849	9731.92	5	0.0513773
22	31				5a	306982	7490.36	48	0.640824		fixed	3a	733178	17889.5	11	0.0614884
23	54				1c	296222	2753.38	18	0.653741			3b	806936	19689.2	9	0.0457102
24	65				1b	844696	7851.45	55	0.700508			3c	482389	11770.3	13	0.110448
25	/				3c	464484	4317.38	31	0.718028			4a	620441	15138.8	3	0.0198167
26	136				3b	796398	7402.52	54	0.729481			4b	702444	17139.6	13	0.0758476
27	195			19hr	1a	487543	4531.71	34	0.750268			4c	765356	18674.7	8	0.0428387
28	48				3a	691355	6426.14	56	0.87144			5a	434569	10603.5	4	0.0377235
29	26				3d	240784	2238.09	21	0.938301			5b	599504	14627.9	1	0.00683625
30	/				4b	625628	5815.21	66	1.13495			5c	534752	13047.9	2	0.0153281
31	155				4a	543133	5048.42	59	1.16868
32	56				6a	243479	5940.89	76	1.27927
33	95
34	112				4c	599939	5576.43	39	0.699372
35	39				5b	622145	5782.84	45	0.778165
36	77				5a	355057	3300.25	31	0.939321
37	114				5c	816692	7591.15	99	1.30415
38	244				3b	261133	6371.65	90	1.41251
39	41				2b	181975	4440.19	65	1.4639
40	41				2c	159112	3882.33	58	1.49395
41	56				3d	267844	6535.39	102	1.56073
42	46				4b	733346	6816.45	112	1.64308
43	21				3c	284917	6951.97	115	1.65421
44	31				3a	185800	4533.52	75	1.65434
45	31				1c	176405	4304.28	77	1.78892
46	56				4a	786866	7313.92	136	1.85947
47	23				2a	258644	6310.91	118	1.86978
48	24			20hr	1a	285447	6964.91	139	1.99572
49	/				1b	211098	5150.79	114	2.21325
50	114												18hr	19hr	20hr	24hr
51	34				5b	218203	5324.15	26	0.488341			0 to 0.5	6	3	0	1
52	22				2b	306372	7475.48	40	0.535083			0.51 to 1	7	11	3	3
53	90				5a	187037	4563.7	41	0.898393			1.01 to 1.5	0	3	4	3
54	77				4a	344455	8404.7	77	0.916154			1.51 to 2	1	0	8	4
55	18				2a	209954	5122.88	56	1.09314			2.01 to 3	0	0	1	4
56	210				5c	238307	5814.69	64	1.10066			over 3.01	0	0	0	1
57	147				4c	207538	5063.93	65	1.28359
58	16				4b	299161	7299.53	112	1.53435
59	18				3a	239171	5835.77	95	1.62789				18hr	19hr	20hr	24hr
60	55				3b	311894	7610.21	147	1.93161			0 -0.5	42.8571	17.6471	0	6.25
61	102				1b	240618	5871.08	114	1.94172			0.51-1	50	64.7059	18.75	18.75
62	59				2c	494966	12077.2	244	2.02034			1.01-1.5	0	17.6471	25	18.75
63	64				1c	288987	7051.28	155	2.19818			1.51-2	7.14286	0	50	25
64	19				1d	384150	9373.26	210	2.24042			2.01-3	0	0	6.25	25
65	66			24hr	1a	328892	8024.96	195	2.42992			> 3.01	0	0	0	6.25
66	/				3c	228455	5574.3	204	3.65965
				12hr	1a	357485	8722.63	13	0.149038
					1b	461316	11256.1	25	0.222102
					1c	391556	9553.97	13	0.136069
					2a	520018	12688.4	25	0.19703
					2b	472606	11531.6	40	0.346873
					2c	403697	9850.21	47	0.477147
					2d	454681	11094.2	57	0.513781
					4b	460700	11241.1	60	0.533757
					3c	382155	9324.58	24	0.257384
					3a	434955	10612.9	33	0.310942
					4a	508275	12401.9	53	0.427354
					4c	287973	7026.54	42	0.597734
					3b	617931	15077.5	32	0.212237

## Sheet: Sheet2
	Animal/IOM	Area (pix^2)	Area (um^2)	# GFP puncta	puncta/100um^2
	5b	405346	9890.44	22	0.222437
	5a	229494	5599.65	16	0.285732
	4c	274844	6706.19	22	0.328055
	3c	258965	6318.75	21	0.332344
	1b	185291	4521.1	21	0.464489
18hr	1a	265723	6483.64	31	0.478126
	5c	311895	7610.24	46	0.604449
	3d	234130	5712.77	38	0.665176
	4b	101987	2488.48	19	0.763517
	3b	263668	6433.5	54	0.839357
	5d	198457	4842.35	43	0.887998
	2b	158325	3863.13	37	0.957773
	2c	236089	5760.57	56	0.972126
	2a	250902	6122.01	106	1.73146
	2c	615272	5718.95	24	0.419657
	2a	428357	3981.58	18	0.452082
	2b	348295	3237.4	15	0.463334
	7b	162866	3973.93	23	0.578772
	4c	660806	6142.19	37	0.602391
	7a	267730	6532.61	41	0.62762
	5a	306982	7490.36	48	0.640824
	1c	296222	2753.38	18	0.653741
	1b	844696	7851.45	55	0.700508				3IL	12hr APF	18hr APF	20hr APF	24hr APF
	3c	464484	4317.38	31	0.718028				0.0812321	0.337034	0.680931	1.52068	1.61871
	3b	796398	7402.52	54	0.729481				0.068853	0.157303	0.396751	0.42368	0.818042
19hr	1a	487543	4531.71	34	0.750268
	3a	691355	6426.14	56	0.87144
	3d	240784	2238.09	21	0.938301
	4b	625628	5815.21	66	1.13495
	4a	543133	5048.42	59	1.16868
	6a	243479	5940.89	76	1.27927
	4c	599939	5576.43	39	0.699372
	5b	622145	5782.84	45	0.778165
	5a	355057	3300.25	31	0.939321
	5c	816692	7591.15	99	1.30415
	3b	261133	6371.65	90	1.41251
	2b	181975	4440.19	65	1.4639
	2c	159112	3882.33	58	1.49395
	3d	267844	6535.39	102	1.56073
	4b	733346	6816.45	112	1.64308
	3c	284917	6951.97	115	1.65421
	3a	185800	4533.52	75	1.65434
	1c	176405	4304.28	77	1.78892
	4a	786866	7313.92	136	1.85947
	2a	258644	6310.91	118	1.86978
20hr	1a	285447	6964.91	139	1.99572
	1b	211098	5150.79	114	2.21325
	5b	218203	5324.15	26	0.488341
	2b	306372	7475.48	40	0.535083
	5a	187037	4563.7	41	0.898393
	4a	344455	8404.7	77	0.916154
	2a	209954	5122.88	56	1.09314
	5c	238307	5814.69	64	1.10066
	4c	207538	5063.93	65	1.28359
	4b	299161	7299.53	112	1.53435
	3a	239171	5835.77	95	1.62789
	3b	311894	7610.21	147	1.93161
	1b	240618	5871.08	114	1.94172
	2c	494966	12077.2	244	2.02034
	1c	288987	7051.28	155	2.19818
	1d	384150	9373.26	210	2.24042
24hr	1a	328892	8024.96	195	2.42992
	3c	228455	5574.3	204	3.65965
12hr	1a	357485	8722.63	13	0.149038
	1b	461316	11256.1	25	0.222102
	1c	391556	9553.97	13	0.136069
	2a	520018	12688.4	25	0.19703
	2b	472606	11531.6	40	0.346873
	2c	403697	9850.21	47	0.477147
	2d	454681	11094.2	57	0.513781
	4b	460700	11241.1	60	0.533757
	3c	382155	9324.58	24	0.257384
	3a	434955	10612.9	33	0.310942
	4a	508275	12401.9	53	0.427354
	4c	287973	7026.54	42	0.597734
	3b	617931	15077.5	32	0.212237
3IL	1a	410345	10012.4	11	0.109864
	1b	440568	10749.9	14	0.130234
	1c	406660	9922.5	26	0.262031
	2a	718647	17535	12	0.0684346
	2b	408691	9972.06	18	0.180504
	2c	398849	9731.92	5	0.0513773
fixed	3a	733178	17889.5	11	0.0614884
	3b	806936	19689.2	9	0.0457102
	3c	482389	11770.3	13	0.110448
	4a	620441	15138.8	3	0.0198167
	4b	702444	17139.6	13	0.0758476
	4c	765356	18674.7	8	0.0428387
	5a	434569	10603.5	4	0.0377235
	5b	599504	14627.9	1	0.00683625
	5c	534752	13047.9	2	0.0153281
