# Supplementary material for: Genetic screen in Drosophila muscle identifies autophagy-mediated T-tubule remodeling and a Rab2 role in autophagy
Source: eLife. 2017 Jan 7;6:e23367. doi: 10.7554/eLife.23367 (PMC5249261; doi:10.7554/eLife.23367)
Supplement: Figure 7—source data 1. — Quantification of the number of LC3 puncta in parental or Rab2A/B double-knockout MEFs grown in fed conditions (.xlsx file). DOI: http://dx.doi.org/10.7554/eLife.23367.020 [file elife-23367-fig7-data1.xlsx]

## Sheet: Sheet1
LC3 puncta in Fed		per cell
	Parent	DKO
	34	193		Parent	DKO
	50	119		17.1333	105.833
	5	43
	3	133
	3	78
	8	89
	10	83
	9	112
	13	225
	33	145
	3	159
	7	57
	28	116
	13	87
	13	32
	38	58
	22	108
	44	91
	19	93
	22	119
	18	98
	18	39
	7	58
	16	39
	33	153
	12	236
	4	118
	5	82
	5	124
	19	88
Average	17.1333	105.833
SD	12.9953	51.0565
SEM	2.37271	9.32198
p-value	1.27498e-10
