# Supplementary material for: Genetic screen in Drosophila muscle identifies autophagy-mediated T-tubule remodeling and a Rab2 role in autophagy
Source: eLife. 2017 Jan 7;6:e23367. doi: 10.7554/eLife.23367 (PMC5249261; doi:10.7554/eLife.23367)
Supplement: Figure 7—source data 2. — Quantification of the number of autophagosomes and autolysosomes per cell area in TEM images of parental or Rab2A/B double-knockout MEFs grown in fed conditions (.xlsx file). DOI: http://dx.doi.org/10.7554/eLife.23367.021 [file elife-23367-fig7-data2.xlsx]

## Sheet: Sheet1
	TEM quant # of organelle /100 um2
WT				Rab2DKO
Image #	AP	AL		Image #	AP	AL
1	1	4		1	3	27
2	2	5		2	1	34
3	1	3		3	2	28
4	0	4		4	5	7
5	0	4		5	4	5
6	0	5		6	0	7
7	1	5		7	1	8
8	1	6		8	1	12
9	0	7		9	4	8
10	2	5		10	0	13
11	0	3		11	7	19
12	1	4		12	0	9
13	0	5		13	0	14
14	3	3		14	0	13
15	0	5		15	0	7
16	0	6		16	1	6
17	0	7		17	2	5
18	0	5		18	0	10
19	0	2		19	3	4
20	0	5		20	1	14
Average	0.6	4.65		Average	1.75	12.5
	Parent	DKO
AP	0.6	1.75
AL	4.6	12.5
