# Supplementary material for: Genetic screen in Drosophila muscle identifies autophagy-mediated T-tubule remodeling and a Rab2 role in autophagy
Source: eLife. 2017 Jan 7;6:e23367. doi: 10.7554/eLife.23367 (PMC5249261; doi:10.7554/eLife.23367)
Supplement: Figure 7—source data 3. — Quantification of the number of Atg8 puncta and Ref(2)P puncta per area of fat body from fed larvae (Figure 7—figure supplement 1B). Pearson correlation indicating colocalization between GFP and mCherry from mCherry:GFP:Atg8 expressed in fat body from starved larvae (Figure 7—figure supplement 1D). Control and Rab2 RNAi lines as shown (.xlsx file). DOI: http://dx.doi.org/10.7554/eLife.23367.022 [file elife-23367-fig7-data3.xlsx]

## Sheet: Sheet1
Atg8 puncta per area					Ref(2)P puncta per area					GFP/mCherry Atg8 coloclization
	Ctrl	Rab2-1	Rab2-2			Ctrl	Rab2-1	Rab2-2			Ctrl	Rab2-1	Rab2-2
	170.406	299.329	284.081			175.765	1675.99	2055.06			0.0691824	0.620253	0.770213
	230.497	32.7683	515.212			82.0413	425.988	2430.16			0.0282486	0.185185	0.628319
	12.105	292.167	292.163			22.9994	1784.86	2026.61			0	0.612782	0.817164
	83.1721	173.163	636.47			52.3676	589.91	2958.15			0.111111	0.353333	0.763209
	21.2329	40.8217	499.471			14.1553	170.846	1726.59			0.133333	0.185185	0.778947
	19.7669	460.106	680.673			65.3828	2647.38	1761.81			0	0.794872	0.614841
	39.792	44.4238	201.624			155.55	347.551	1180.94			0.0909091	0.235294	0.357143
	12.7415	67.8726	0			39.4987	377.885	0			0.2	0.108108	0
	15.6656	9.45617	41.9931			18.0756	68.5572	1365.78			0.153846	0	0.619048
	44.1382	291.873	329.827			3.39525	710.481	1248.54			0.025641	0.388158	0.472727
	81.6126	44.7032	8.91451			28.636	132.321	117.671			0.175439	0	0.4
	41.5251	9.68584	183.368			4.15251	29.0575	1074.01			0	0.166667	0.357143
	46.4766	118.903	231.323			35.4108	481.872	1298.96			0.0238095	0.31579	0.352941
	111.494	213.489	23.8224			451.843	990.092	1533.04			0.221053	0.427536	0.411765
	120.368	245.252	8.18494			12.0368	625.92	712.09			0.0875	0.159509	0.25
	215.199	147.89	96.9255			439.156	1281.71	1113.59			0.19186	0.611111	0.5
	113.675	180.148	101.233			38.8888	702.209	1923.43			0.289474	0.255102	0.526316
	680.282	327.265	353.989			717.66	1611.15	1537.23			0.148352	0.450549	0.324074
	19.4526	117.828	402.252			47.983	579.935	2399.64			0.2	0.5625	0.510345
	31.4351	107.179	453.121			80.0167	705.125	2413.1			0.0909091	0.578947	0.709677
	140.333	1368.79	163.767			235.265	3036.12	409.418			0.254902	0.512217	0.0675676
	187.124	550.699	426.222			354.068	2950.66	2896.93			0.156863	0.444444	0.677419
	223.248	194.527	237.136			1007.83	1935.54	680.549			0.211538	0.5	0.308219
	198.707	305.972	181.624			348.09	1627.68	2539.85			0.184397	0.542751	0.84127
Number of values	24	24	24		Number of values	24	24	24		Number of values	24	24	24
Minimum	12.1	9.456	0		Minimum	3.395	29.06	0		Minimum	0	0	0
25% Percentile	23.78	50.5	98		25% Percentile	24.41	389.9	1084		25% Percentile	0.03848	0.1852	0.354
Median	82.39	176.7	234.2		Median	58.88	703.7	1535		Median	0.1408	0.4078	0.5052
75% Percentile	182.9	297.5	420.2		75% Percentile	319.9	1664	2313		75% Percentile	0.198	0.5576	0.7016
Maximum	680.3	1369	680.7		Maximum	1008	3036	2958		Maximum	0.2895	0.7949	0.8413
Mean	119.2	235.2	264.7		Mean	184.6	1062	1558		Mean	0.127	0.3754	0.5024
Std. Deviation	141.1	279.8	199.6		Std. Deviation	255	903.4	825.4		Std. Deviation	0.08551	0.214	0.2289
Std. Error	28.8	57.12	40.74		Std. Error	52.06	184.4	168.5		Std. Error	0.01746	0.04369	0.04673
Lower 95% CI of mean	59.6	117	180.4		Lower 95% CI of mean	76.91	680.5	1210		Lower 95% CI of mean	0.09091	0.285	0.4058
Upper 95% CI of mean	178.8	353.3	349		Upper 95% CI of mean	292.3	1444	1907		Upper 95% CI of mean	0.1631	0.4658	0.5991
D'Agostino & Pearson omnibus normality test					D'Agostino & Pearson omnibus normality test					D'Agostino & Pearson omnibus normality test
K2	36.08	38.85	1.451		K2	19.61	3.997	0.5967		K2	2.121	1.122	0.8572
P value	< 0.0001	< 0.0001	0.484		P value	< 0.0001	0.1356	0.7421		P value	0.3462	0.5706	0.6514
Passed normality test (alpha=0.05)?	No	No	Yes		Passed normality test (alpha=0.05)?	No	Yes	Yes		Passed normality test (alpha=0.05)?	Yes	Yes	Yes
P value summary	***	***	ns		P value summary	***	ns	ns		P value summary	ns	ns	ns
Sum	2860	5644	6353		Sum	4430	25489	37403		Sum	3.048	9.01	12.06
Column A	Ctrl				Column A	Ctrl				Column A	Ctrl
vs	vs				vs	vs				vs	vs
Column B	Rab2-1				Column B	Rab2-1				Column B	Rab2-1
Mann Whitney test					Mann Whitney test					Unpaired t test
P value	0.0382				P value	< 0.0001				P value	< 0.0001
Exact or approximate P value?	Gaussian Approximation				Exact or approximate P value?	Gaussian Approximation				P value summary	***
P value summary	*				P value summary	***				Are means signif. different? (P < 0.05)	Yes
Are medians signif. different? (P < 0.05)	Yes				Are medians signif. different? (P < 0.05)	Yes				One- or two-tailed P value?	Two-tailed
One- or two-tailed P value?	Two-tailed				One- or two-tailed P value?	Two-tailed				t, df	t=5.280 df=46
Sum of ranks in column A,B	487 , 689				Sum of ranks in column A,B	374 , 802
Mann-Whitney U	187				Mann-Whitney U	74				How big is the difference?
										Mean ± SEM of column A	0.1270 ± 0.01746 N=24
Column A	Ctrl				Column A	Ctrl				Mean ± SEM of column B	0.3754 ± 0.04369 N=24
vs	vs				vs	vs				Difference between means	-0.2484 ± 0.04705
Column C	Rab2-2				Column C	Rab2-2				95% confidence interval	-0.3432 to -0.1536
										R squared	0.3773
Mann Whitney test					Mann Whitney test
P value	0.0097				P value	< 0.0001				F test to compare variances
Exact or approximate P value?	Gaussian Approximation				Exact or approximate P value?	Gaussian Approximation				F,DFn, Dfd	6.266, 23, 23
P value summary	**				P value summary	***				P value	< 0.0001
Are medians signif. different? (P < 0.05)	Yes				Are medians signif. different? (P < 0.05)	Yes				P value summary	***
One- or two-tailed P value?	Two-tailed				One- or two-tailed P value?	Two-tailed				Are variances significantly different?	Yes
Sum of ranks in column A,C	462 , 714				Sum of ranks in column A,C	341 , 835
Mann-Whitney U	162				Mann-Whitney U	41				Column A	Ctrl
										vs	vs
										Column C	Rab2-2
										Unpaired t test
										P value	< 0.0001
										P value summary	***
										Are means signif. different? (P < 0.05)	Yes
										One- or two-tailed P value?	Two-tailed
										t, df	t=7.526 df=46
										How big is the difference?
										Mean ± SEM of column A	0.1270 ± 0.01746 N=24
										Mean ± SEM of column C	0.5024 ± 0.04673 N=24
										Difference between means	-0.3754 ± 0.04988
										95% confidence interval	-0.4759 to -0.2749
										R squared	0.5518
										F test to compare variances
										F,DFn, Dfd	7.166, 23, 23
										P value	< 0.0001
										P value summary	***
										Are variances significantly different?	Yes
