# Supplementary material for: Genetic screen in Drosophila muscle identifies autophagy-mediated T-tubule remodeling and a Rab2 role in autophagy
Source: eLife. 2017 Jan 7;6:e23367. doi: 10.7554/eLife.23367 (PMC5249261; doi:10.7554/eLife.23367)
Supplement: Figure 7—source data 4. — Quantification of the number of autolysosomes, autolysosome size and number of autophagosomes per tissue area in TEM images of control or Rab2 RNA fat body from fed or starved conditions (.xlsx file). DOI: http://dx.doi.org/10.7554/eLife.23367.023 [file elife-23367-fig7-data4.xlsx]

## Sheet: measurements
	STV	IRrab2	n= 11 flied							FED IRrab2	n= 8 field								stv_lacZ	n=10 field								fed_lacZ	n=11 field
	#AP	#AL	size AP	sizeAL	tussus area	AL/tissus	AP/tissus			#AP	#AL	size AP	sizeAL	tussus area	AL/tissus	AP/tissus		2900	#AP	#AL	size AP	sizeAL	tussus area	AL/tissus	AP/tissus		2900	#AP	#AL	size AP	sizeAL	tussus area	AL/tissus	AP/tissus
4800 X1A	0	6		2.65561	35.8066	0.167567	0		4800 2A	0	9	0	0.110699	35.799	0.251404	0		4800 1A									4800 1B	0	0			27.44	0	0
				1.78597									0.221375						2	3	0.057434	0.632698	47.64	0.0629723	0.0419815
				0.912878									0.822873								0.058667	1.44697					4800 1C	0	1		0.058	29.45	0.0339559	0
				0.908842									0.758852					4800 1B	3	2	0.132164	0.905799	55.59	0.0359777	0.0539665
				0.761772									0.469253								0.163275	0.641744					4800 1D	0	0			46.5	0	0
				0.57052									0.684074								0.332372
4800x 6AA	4	13	0.43199	2.16014	59.44	0.218708	0.0672948						0.288025					4800 1AC	1	3	0.0748	1.54877	52.76	0.0568613	0.0189538		4800 1	0	1		0.1363	17.94	0.0557414	0
			0.389943	1.87443									0.369631									0.613379
			0.154244	1.62066									0.669149									0.578913					4800 2	0	2		0.545402	35.79	0.0558815	0
			0.044301	1.52316					4800 2B	1	12	0.069	0.854778	31.55	0.380349	0.0316957		48001aD	2	4	0.153388	0.810066	35.97	0.111204	0.0556019						0.904485
				0.850978									0.666824								0.109518	0.602216					4800 3	0	1		0.0408	37.83	0.026434	0
				0.789603									0.555241									0.417439
				0.73044									0.484792									0.143483					4800 4b	0	0			23.66	0	0
				0.618582									0.423866					4800 3abc	2	5	0.110799	0.247576	49.42	0.101174	0.0404694
				0.455742									0.392902								0.132245	0.076933					4800 4C	0	0			22.023	0	0
				0.398351									0.355898									1.13671
				0.169078									0.334759									0.140227					4800 4	0	0			42.44	0	0
				0.145761									0.283256									0.193526
				0.095439									0.069386					4800 3d	2	4	0.202599	0.193318	33.91	0.117959	0.0589797		4800 5	0	2		0.420704	24.79	0.0806777	0
4800 6A	2	13	0.215922	2.0288	58.09	0.223791	0.0344293						0.060525								0.191895	0.281503									0.323937
			0.113804	0.48319									0.051659									0.229201					4800 6	0	0			33.46	0	0
				3.19043					4800 3A	0	14		1.25338	34.717	0.403261	0						0.825756
				0.067869									1.08434					4800 3E	3	2	0.0756	2.1269	34.095	0.0586596	0.0879894
				0.063592									0.534712								0.062193	0.059154
				0.047779									0.498748								0.088318
				0.117065									0.466626					4800 10A	2	2	0.305506	0.627528	33.5	0.0597015	0.0597015
				1.7475									0.460931								0.07974	1.59885
				0.498823									0.42906					4800 11A	4	2	0.033847	0.382925	47.02	0.0425351	0.0850702
				0.194216									0.397779								0.24725	0.412921
				0.054943									0.376007								0.122004
				1.0167									0.26129								0.047802
				0.185529									0.241782					4800 9A	2	1	0.269239	0.4235	21.43	0.0466636	0.0933271
4800 5A	2	13	1.62666	4.45472	48.92	0.26574	0.0408831						0.168951								0.248554
			0.41051	2.5054									0.142949
				2.43546									0.072963
				2.21774					4800 1A	0	15		1.22763	36.42	0.411862	0
				1.26718									0.996385
				1.12351									0.974565
				1.05244									0.828913
				0.98724									0.818299
				0.837339									0.733181
				0.614135									0.514031
				0.400662									0.451148
				0.399324									0.376711
				0.051115									0.35061
4800 4A	4	9	0.445217	3.4152	39	0.230769	0.102564						0.2869
			0.218157	1.16855									0.266413
			0.170364	0.916834									0.26354
			0.20043	0.722415									0.148814
				0.566068									0.07095
				0.553119					4800 4A	1	10	0.2742	1.66836	33.78	0.296033	0.0296033
				0.500501									0.69811
				0.420808									0.595851
				0.381881									0.553629
4800 3A	1	6	0.1812	1.72286	27.92	0.2149	0.0358166						0.528762
				1.36182									0.471526
				0.980884									0.470156
				0.769698									0.450534
				0.513341									0.436257
				0.385851									0.364844
4800 2bb	1	12	0.258	3.36089	38.03	0.31554	0.026295		4800 5A	0	5		0.816267	26.31	0.190042	0
				1.30425									0.690959
				1.26818									0.303119
				1.10436									0.180577
				1.05589									0.105577
				1.0395					4800 6A	0	6		0.944154	37.42	0.160342	0
				0.923204									0.507202
				0.822717									0.437613
				0.59215									0.354527
				0.375198									0.290647
				0.303459									0.08051
				0.154603					4800 6B	0	7		1.48753	32.7	0.214067	0
4800 2A	0	9		2.33977	39.31	0.228949	0						0.469783
				1.46383									0.305137
				0.455558									0.256474
				0.960818									0.248289
				0.2044									0.153908
				1.49421									0.145709
				1.77381
				1.29523
				1.25484
4800 4AA	2	12	0.298729	2.54538	34.38	0.34904	0.0581734
			0.128918	1.77767
				1.69781
				1.29616
				1.0857
				0.911895
				0.805198
				0.751682
				0.630983
				0.541612
				0.36844
				0.146371
4800 5B	0	11		3.58965	50.61	0.217348	0
				2.49435
				1.624
				1.51757
				1.40534
				0.799112
				0.45362
				0.422268
				0.256177
				0.088889
				0.074258
4800 5c	1	16	0.225	3.86592	59.51	0.268862	0.0168039
				3.40201
				2.39159
				2.2622
				2.04526
				1.794
				1.67575
				1.56082
				1.44822
				1.44363
				0.939575
				0.728242
				0.578946
				0.544291
				0.518752
				0.127297

## Sheet: quantification
AL number per area						AP number per area						AL size
	Fed_ctl	Stv_ctl	Fed_irRab2	Stv_irRab2			Fed_ctl	Stv_ctl	Fed_irRab2	Stv_irRab2			Fed_ctl	Stv_ctl	Fed_irRab2	Stv_irRab2
	0	0.0629723	0.251404	0.218708			0	0.0419815	0	0.0672948			0.058	0.632698	0.110699	2.16014
	0.0339559	0.0359777	0.380349	0.223791			0	0.0539665	0.0316957	0.0344293				1.44697	0.221375	1.87443
	0	0.0568613	0.403261	0.26574			0	0.0189537	0	0.0408831				0.905799	0.822873	1.62066
	0.0557414	0.111204	0.411862	0.230769			0	0.0556019	0	0.102564				0.641744	0.758852	1.52316
	0.0558815	0.101174	0.296033	0.2149			0	0.0404694	0.0296033	0.0358166			0.1363		0.469253	0.850978
	0.0264341	0.117959	0.190042	0.31554			0	0.0589797	0	0.026295				1.54877	0.684074	0.789603
	0	0.0586596	0.160342	0.228949			0	0.0879894	0	0			0.545402	0.613379	0.288025	0.73044
	0	0.0597015	0.214067	0.34904			0	0.0597015	0	0.0581734			0.904485	0.578913	0.369631	0.618582
	0	0.0425351		0.217348			0	0.0850702		0			0.0408	0.810066	0.669149	0.455742
	0.0806777	0.0466636		0.268862			0	0.0933271		0.0168039				0.602216	0.854778	0.398351
	0			0.167567			0			0				0.417439	0.666824	0.169078
														0.143483	0.555241	0.145761		Table Analyzed	size al
One-way analysis of variance						Table Analyzed	AP#/tissus							0.247576	0.484792	0.095439
P value	< 0.0001													0.076933	0.423866	2.0288		One-way analysis of variance
P value summary	****					One-way analysis of variance								1.13671	0.392902	0.48319		P value	< 0.0001
Are means signif. different? (P < 0.05)	Yes					P value	< 0.0001							0.140227	0.355898	3.19043		P value summary	****
Number of groups	4					P value summary	****						0.420704	0.193526	0.334759	0.067869		Are means signif. different? (P < 0.05)	Yes
F	52.86					Are means signif. different? (P < 0.05)	Yes						0.323937	0.193318	0.283256	0.063592		Number of groups	4
R square	0.815					Number of groups	4							0.281503	0.069386	0.047779		F	15
						F	16.05							0.229201	0.060525	0.117065		R square	0.1648
Bartlett's test for equal variances						R square	0.5722							0.825756	0.051659	1.7475
Bartlett's statistic (corrected)	17.06													2.1269	1.25338	0.498823		Bartlett's test for equal variances
P value	0.0007					Bartlett's test for equal variances								0.059154	1.08434	0.194216		Bartlett's statistic (corrected)	83.25
P value summary	***					Bartlett's statistic (corrected)	3.4e+38								0.534712	0.054943		P value	< 0.0001
Do the variances differ signif. (P < 0.05)	Yes					P value								0.627528	0.498748	1.0167		P value summary	****
						P value summary	ns							1.59885	0.466626	0.185529		Do the variances differ signif. (P < 0.05)	Yes
ANOVA Table	SS	df	MS			Do the variances differ signif. (P < 0.05)	No							0.382925	0.460931	4.45472
Treatment (between columns)	0.4962	3	0.1654											0.412921	0.42906	2.5054		ANOVA Table	SS	df	MS
Residual (within columns)	0.1126	36	0.003129			ANOVA Table	SS	df	MS						0.397779	2.43546		Treatment (between columns)	22.82	3	7.606
Total	0.6088	39				Treatment (between columns)	0.02226	3	0.00742						0.376007	2.21774		Residual (within columns)	115.6	228	0.5071
						Residual (within columns)	0.01664	36	0.0004623					0.4235	0.26129	1.26718		Total	138.4	231
Tukey's Multiple Comparison Test	Mean Diff.	q	Significant? P < 0.05?	Summary	95% CI of diff	Total	0.0389	39							0.241782	1.12351
Fed_ctl vs Stv_ctl	-0.0464	2.685	No	ns	-0.1123 to 0.01949										0.168951	1.05244		Tukey's Multiple Comparison Test	Mean Diff.	q	Significant? P < 0.05?	Summary	95% CI of diff
Fed_ctl vs Fed_irRab2	-0.2654	14.44	Yes	***	-0.3355 to -0.1954	Tukey's Multiple Comparison Test	Mean Diff.	q	Significant? P < 0.05?	Summary	95% CI of diff				0.142949	0.98724		Fed_ctl vs Stv_ctl	-0.2936	1.375	No	ns	-1.080 to 0.4930
Fed_ctl vs Stv_irRab2	-0.2226	13.2	Yes	***	-0.2869 to -0.1583	Fed_ctl vs Stv_ctl	-0.0596	8.973	Yes	***	-0.08493 to -0.03428				0.072963	0.837339		Fed_ctl vs Fed_irRab2	-0.1355	0.682	No	ns	-0.8673 to 0.5963
Stv_ctl vs Fed_irRab2	-0.219	11.68	Yes	***	-0.2906 to -0.1475	Fed_ctl vs Fed_irRab2	-0.007662	1.085	No	ns	-0.03460 to 0.01927				1.22763	0.614135		Fed_ctl vs Stv_irRab2	-0.783	3.999	Yes	*	-1.504 to -0.06184
Stv_ctl vs Stv_irRab2	-0.1762	10.2	Yes	***	-0.2421 to -0.1103	Fed_ctl vs Stv_irRab2	-0.03475	5.361	Yes	**	-0.05947 to -0.01004				0.996385	0.400662		Stv_ctl vs Fed_irRab2	0.1581	1.406	No	ns	-0.2560 to 0.5722
Fed_irRab2 vs Stv_irRab2	0.04285	2.332	No	ns	-0.02722 to 0.1129	Stv_ctl vs Fed_irRab2	0.05194	7.203	Yes	***	0.02445 to 0.07944				0.974565	0.399324		Stv_ctl vs Stv_irRab2	-0.4894	4.563	Yes	**	-0.8844 to -0.09436
						Stv_ctl vs Stv_irRab2	0.02485	3.741	No	ns	-0.0004729 to 0.05018				0.828913	0.051115		Fed_irRab2 vs Stv_irRab2	-0.6475	8.841	Yes	***	-0.9172 to -0.3777
						Fed_irRab2 vs Stv_irRab2	-0.02709	3.835	Yes	*	-0.05402 to -0.0001552				0.818299	3.4152
															0.733181	1.16855
															0.514031	0.916834
															0.451148	0.722415
															0.376711	0.566068
															0.35061	0.553119
															0.2869	0.500501
															0.266413	0.420808
															0.26354	0.381881
															0.148814	1.72286
															0.07095	1.36182
															1.66836	0.980884
															0.69811	0.769698
															0.595851	0.513341
															0.553629	0.385851
															0.528762	3.36089
															0.471526	1.30425
															0.470156	1.26818
															0.450534	1.10436
															0.436257	1.05589
															0.364844	1.0395
															0.816267	0.923204
															0.690959	0.822717
															0.303119	0.59215
															0.180577	0.375198
															0.105577	0.303459
															0.944154	0.154603
															0.507202	2.33977
															0.437613	1.46383
															0.354527	0.455558
															0.290647	0.960818
															0.08051	0.2044
															1.48753	1.49421
															0.469783	1.77381
															0.305137	1.29523
															0.256474	1.25484
															0.248289	2.54538
															0.153908	1.77767
															0.145709	1.69781
																1.29616
																1.0857
																0.911895
																0.805198
																0.751682
																0.630983
																0.541612
																0.36844
																0.146371
																3.58965
																2.49435
																1.624
																1.51757
																1.40534
																0.799112
																0.45362
																0.422268
																0.256177
																0.088889
																0.074258
																3.86592
																3.40201
																2.39159
																2.2622
																2.04526
																1.794
																1.67575
																1.56082
																1.44822
																1.44363
																0.939575
																0.728242
																0.578946
																0.544291
																0.518752
																0.127297
																2.65561
																1.78597
																0.912878
																0.908842
																0.761772
																0.57052
