# Supplementary material for: Genetic screen in Drosophila muscle identifies autophagy-mediated T-tubule remodeling and a Rab2 role in autophagy
Source: eLife. 2017 Jan 7;6:e23367. doi: 10.7554/eLife.23367 (PMC5249261; doi:10.7554/eLife.23367)
Supplement: Figure 7—source data 5. — Quantification of EGFR protein levels normalized to actin levels and percent of ratio at 0h over timecourse as shown for control, Rab2A/2B double knockout and myc:Rab2A revertant of double knockout (.xlsx file). DOI: http://dx.doi.org/10.7554/eLife.23367.024 [file elife-23367-fig7-data5.xlsx]

## Sheet: Sheet1
EGFR degradation assay
#1
Parent	EGFR	actin	EGFR/actin	set 0h as 100		DKO	EGFR	actin	EGFR/actin	set 0h as 100		Revertant	EGFR	actin	EGFR/actin	set 0h as 100
0	79451	9140	8.69267	100		0	71564	20431	3.50272	100		0	81731	37521	2.17827	100
1	63831	12372	5.15931	59.3524		1	51902	21089	2.46109	70.2624		1	72059	45804	1.5732	72.2225
2	42019	18210	2.30747	26.545		2	32160	19810	1.62342	46.3475		2	62616	66526	0.941226	43.2097
3	23511	20826	1.12893	12.9871		3	18222	22466	0.811092	23.1561		3	19421	69186	0.280707	12.8867
#2
Parent	EGFR	actin	EGFR/actin	set 0h as 100		DKO	EGFR	actin	EGFR/actin	set 0h as 100		Revertant	EGFR	actin	EGFR/actin	set 0h as 100
0	50362	104374	0.482515	100		0	71896	98797	0.727714	100		0	59586	50757	1.17395	100
1	36701	112246	0.326969	67.7636		1	63149	95449	0.661599	90.9147		1	52348	56383	0.928436	79.0867
2	20994	112082	0.187309	38.8194		2	37710	99273	0.379862	52.1993		2	24979	62902	0.39711	33.8269
3	14504	101136	0.143411	29.7215		3	23618	85874	0.275031	37.7938		3	17248	43121	0.399991	34.0723
#3
Parent	EGFR	actin	EGFR/actin	set 0h as 100		DKO	EGFR	actin	EGFR/actin	set 0h as 100		Revertant	EGFR	actin	EGFR/actin	set 0h as 100
0	130852	40233	3.25236	100		0	174657	55625	3.1399	100		0	225605	92823	2.43049	100
1	98649	38639	2.55309	78.4999		1	115785	49896	2.32053	73.9045		1	191020	110377	1.73061	71.2044
2	64432	38742	1.6631	51.1354		2	70866	63755	1.11154	35.4004		2	115620	118502	0.97568	40.1434
3	47127	43094	1.09359	33.6244		3	63993	75502	0.847567	26.9934		3	75150	108489	0.692697	28.5003
	Parent	Average	SEM				DKO	Average	SEM				Revertant	Average	SEM
	0	100					0	100					0	100
	1	68.5386	9.59721				1	78.3605	11.0237				1	74.1712	4.28728
	2	38.8333	12.2952				2	44.6491	8.52728				2	39.06	4.78431
	3	25.4444	10.9634				3	29.3144	7.58985				3	25.1531	10.9823
		Parent	DKO	Revertant
	0	100	100	100
	1	68.5386	78.3605	74.1712
	2	38.8333	44.6491	39.06
	3	25.4444	29.3144	25.1531
