# Supplementary material for: Genetic screen in Drosophila muscle identifies autophagy-mediated T-tubule remodeling and a Rab2 role in autophagy
Source: eLife. 2017 Jan 7;6:e23367. doi: 10.7554/eLife.23367 (PMC5249261; doi:10.7554/eLife.23367)
Supplement: Figure 8—source data 1. — Quantification of percent LC3 puncta that colocalizes with GFP:Rab2A, GFP:Rab2B or GFP in MEFs (.xlsx file). DOI: http://dx.doi.org/10.7554/eLife.23367.028 [file elife-23367-fig8-data1.xlsx]

## Sheet: Sheet1
Colocalization with LC3				% of colocalization in the cell
	GFP-Rab2A	GFP-Rab2B	GFP
1	76	50.9804	6.06061
2	63.6364	58.0645	0
3	75.7576	47.3684	0
4	62.5	48.7805	0
5	71.7391	65.7895	5
6	56.3636	82.8571	0
7	61.1111	72.4138	8.57143
8	38.6364	62	7.14286
9	78.3333	57.5758	8.88889
10	70.7317	80	5.71429
Average	65.4809	62.583	4.13781
SD	11.9412	12.5776	3.75162
	GFP-Rab2A	GFP-Rab2B	GFP
Average	65.4809	62.583	4.13781
SD	11.9412	12.5776	3.75162
p-value	1.06055e-08	3.40629e-08
