# Supplementary material for: Genetic screen in Drosophila muscle identifies autophagy-mediated T-tubule remodeling and a Rab2 role in autophagy
Source: eLife. 2017 Jan 7;6:e23367. doi: 10.7554/eLife.23367 (PMC5249261; doi:10.7554/eLife.23367)
Supplement: Figure 8—source data 2. — Quantification of percent mStrawberry:Rab2A (Figure 8H) or mStrawberry:Rab2B (Figure 8—figure supplement 1D) puncta that colocalizes with GFP:LC3 or Atg16L1 in MEFs (.xlsx file). DOI: http://dx.doi.org/10.7554/eLife.23367.029 [file elife-23367-fig8-data2.xlsx]

## Sheet: Sheet1
Rab2b-Atg16L LC3 colocalization				Twenty randomly selected mSt:Rab2 puncta were counted per cell
	LC3	Atg16L1
1	60	10
2	65	15
3	50	5
4	75	0
5	45	15
6	50	10
7	40	5
8	65	15
9	55	10
10	45	5
Average	55	9
SD	11.0554	5.16398
	LC3	Atg16L1
	55	9
p-value	2.77809e-08
Rab2a-Atg16L LC3 colocalization
	LC3	Atg16L1
1	80	15
2	60	5
3	70	10
4	65	0
5	60	5
6	55	10
7	45	10
8	70	10
9	65	15
10	50	5
Average	62	8.5
SD	10.328	4.74342
	LC3	Atg16L1
	62	8.5
p-value	2.19723e-09
