# Supplementary material for: Genetic screen in Drosophila muscle identifies autophagy-mediated T-tubule remodeling and a Rab2 role in autophagy
Source: eLife. 2017 Jan 7;6:e23367. doi: 10.7554/eLife.23367 (PMC5249261; doi:10.7554/eLife.23367)
Supplement: Figure 8—source data 3. — Quantification of percent mStrawberry:Rab2A (Figure 8—figure supplement 1F) or mStrawberry:Rab2B (Figure 8—figure supplement 1H) puncta that colocalizes with GFP:LC3 or Lamp1 in MEFs (.xlsx file). DOI: http://dx.doi.org/10.7554/eLife.23367.030 [file elife-23367-fig8-data3.xlsx]

## Sheet: Sheet1
Colocalization with mSt:Rab2B				Twenty randomly selected mSt:Rab2 puncta were counted per cell
	GFP:LC3	Lamp1
1	70	20
2	50	15
3	80	10
4	95	25
5	75	10
6	85	40
7	75	20
8	80	25
9	55	15
10	70	20
Average	73.5	20
SD	13.3437	8.81917
	LC3	Lamp1
	73.5	20
	13.3437	8.81917
p-value	1.60893e-08
Colocalization with mSt:Rab2A
	GFP:LC3	Lamp1
1	60	15
2	55	20
3	55	15
4	75	5
5	70	25
6	65	30
7	45	10
8	70	20
9	65	15
10	50	10
Average	61	16.5
SD	9.66092	7.47217
	LC3	Lamp1
	61	16.5
	9.66092	7.47217
p-value	1.95927e-09
