# Supplementary material for: Genetic screen in Drosophila muscle identifies autophagy-mediated T-tubule remodeling and a Rab2 role in autophagy
Source: eLife. 2017 Jan 7;6:e23367. doi: 10.7554/eLife.23367 (PMC5249261; doi:10.7554/eLife.23367)
Supplement: Figure 9—source data 1. — Quantification of the percent YFP:Rab2 puncta colocalized with mCherry:Atg8 puncta in IOMs at 4d APF for the control and RNAi conditions shown (.xlsx file). DOI: http://dx.doi.org/10.7554/eLife.23367.034 [file elife-23367-fig9-data1.xlsx]

## Sheet: Sheet1
Colocalization between YFP:Rab2 and mCh:Atg8
Control (LacZ)						Stx17 RNAi
	YFP:Rab2 (+)	# of mCh:Atg8	% of Rab2(+) in total Atg8				YFP:Rab2 (+)	# of mCh:Atg8	% of Rab2(+) in total Atg8
1	4	23	17.3913			1	18	68	26.4706
2	5	27	18.5185			2	21	63	33.3333
3	1	32	3.125			3	21	81	25.9259
4	4	45	8.88889			4	15	72	20.8333
5	3	28	10.7143			5	32	88	36.3636
6	4	24	16.6667			6	16	64	25
7	4	20	20			7	26	103	25.2427
8	0	35	0			8	21	91	23.0769
9	1	21	4.7619			9	20	83	24.0964
10	6	26	23.0769			10	8	74	10.8108
		Average	12.3143					Average	25.1154
		SD	7.92698					SD	6.86967
Rab7 RNAi						Vps39 RNAi
	YFP:Rab2 (+)	# of mCh:Atg8	% of Rab2(+) in total Atg8				YFP:Rab2 (+)	# of mCh:Atg8	% of Rab2(+) in total Atg8
1	19	90	21.1111			1	13	35	37.1429
2	38	87	43.6782			2	15	52	28.8462
3	19	72	26.3889			3	8	46	17.3913
4	23	96	23.9583			4	13	38	34.2105
5	24	75	32			5	12	57	21.0526
6	25	80	31.25			6	19	38	50
7	16	83	19.2771			7	12	39	30.7692
8	7	50	14			8	19	42	45.2381
9	24	82	29.2683			9	18	67	26.8657
10	17	52	32.6923			10	13	44	29.5455
		Average	27.3624					Average	32.1062
		SD	8.36929					SD	10.042
	LacZ	Rab7 RNAi	Stx17 RNAi	Vps39 RNAi
Average	12.3143	27.3624	25.1154	32.1062
SD	7.92698	8.36929	6.86967	10.042
p-value		0.000634968	0.00118626	0.000135668
